# Supplementary material for: Lack of Scientific Theses Publications Among Sudanese Medical Specialized Board (Smsb) Gradutes
Source: Research Square preprint supplement (doi:10.21203/rs.3.rs-5947306/v1), 2025-03-11
Supplement: Supplementary file 1 [file 35d7bce4c070ea5f46ad7bde.xlsx]

## Sheet: mutasim
gender	age	job	specialty	graduation	RMcourse	ifyes	yearsinRO	attendcousre	nonMD	Nowresearch	publishing	ifye	howmanyp	firstauther	howmany	correspondingauther	howmanytime	Q1	Q2	Q3	Q4	carrepromation	presonalinterst	institionalman	others	researchgrant	surseoffund	presentpaper	localconfer	international	mentorship	funding	indexperince	indresechfaci	tarining	writingexp	motivation	time	manuscriptrej	promation	other
1	31	1	4	4	1	2	4	1	1	1	2															2	4	2			1		1		1	1
2	34	1	3	2	1	2	2	2	2	1	2			2		2										2	4	2			1	1	1			1
2	37	1	3	2	1	2	4	2	2	2	2			2		2										2	4	2					1
2	33	1	3	1	1	2	3	2	2	2	2			2		2										2	4	2				1	1		1	1
2	39	2	3	1	1	2	3	1	1	2	2															2	4	2			1		1		1		1			1
1	37	2	1	1	1	2	3	2	2	2	2			2		2										2	4	2			1	1	1	1	1	1	1
1	33	1	4	1	1	2	3	2	2	2	1	1	1	1	1	2						2				2	4	2			1	1	1		1	1
2	33	1	3	4	2			2	2	2	2			2		2										2	4	2			1	1			1		1
1	33	1	4	4	1	2	2	1	2	2	2					2										2	4	2			1	1	1	1	1	1	1
1	30	1	4	4	1	2	3	1	1	1	2															2	4	2			1		1		1
2	31	1	1	4	1	2	3	2	1	2	2			2		2										2	4	1	1			1	1
1	40	2	4	2	1	2	2	1	1	2	2															2	4	2			1	1	1	1	1	1	1		1	1
2	35	1	4	4	1	2	2	2	2	2	2															2	4	2					1
1	32	1	4	4	1	2	4	2	2	2	2			2				2				2				1	4	2					1		1
2	35	1	4	3	1	2	2	1	2	2	2					2										2	4	2				1
1	38	1	4	1	1	2	4	2	1	2	2			2		2										2	4	2				1		1	1		1
1	38	1	4	1	1	2	4	2	1	2	2			2		2										2	4	2				1		1	1		1
1	38	1	4	1	1	2	4	2	1	2	2			2		2										2	4	2				1		1	1		1
1	31	1	2	4	1	2	4	2	2	2	2			2		2										2	4	2									1
1	35	1	2	4	1	2	2	1	1	1	1	1	2	1	1	1	2		2	2			2	2		2	4	2				1		1			1
2	33	1	2	4	1	2	1	2	2	2	1	1	1	1	1	2		2						2		2	4	2					1
1	36	1	2	3	1	2	2	2	1	2	1	1	1	1	1	2				2		2		2		2	4	2				1		1	1	1
1	34	1	2	3	1	2	3	2	2	2	1	1	1	1	1	1	1			2			2			2	4	2							1
1	37	1	2	4	1	2	1	2	2	2	2															2	4	2			1	1	1	1	1	1	1
2	33	1	4	1	1	2	3	1	1	2	1	4	1	1	1	2						2				2	4	1	1			1	1		1
1	33	1	2	3	1	2	2	1	1	2	2			2		2										2	4	2			1			1					1
1	35	1	4	2	1	2	4	2	2	2	2		1													2	4	2					1	1	1	1
1	32	1	2	4	1	2	2	2	1	2	1	1	1	1	1	2		2					2			2	4	1		1		1
1	34	1	1	4	1	2	3	2	2	2	2			2		2						2				2	4	2				1	1		1	1	1
2	39	1	1	2	2			2	1	2	1	1	1	1	1	2		2	2	2	2					2	4	2					1			1	1
1	34	2	4	2	1	2	2	2	2	2	2															2	4	2							1
1	35	2	1	2	1	2	3	2	1	2	2															2	4	2			1	1	1	1	1	1	1			1
2	33	2	1	3	1	2	3	2	2	2	2			2		2										2	4	2						1
1	35	2	2	2	1	2		1	1	1	2			2		2										2	4	1	1			1	1	1	1	1	1		1	1
2	32	1	2	4	1	2	1	1	1	2	1	2	1		1	1	1						2			2	4	2				1			1		1
2	34	1	1	3	1	1	1	1	1	2	1	2	3	1	2	1	2	2						2		1	2	2			1	1		1			1
1	34	1	2	4	1	2	2	1	1	1	1	1	4	1	1	2			2				2			2	4	2				1
1	32	1	4	4	1	2	3	2	2	2	2			2		2										2	4	2			1		1		1	1	1
2	35	1	2	4	1	2	2	2	1	2	1	4	2	1	1	1	1		2			2	2			2	4	2						1			1
1	44	1	4	1	1	2	1	1	1	1	1	4	1	2		2							2			2	4	1	1	1	1		1		1	1	1
2	32	1	2	4	1	2	1	2	2	2	1		1	2		2							2			2	4	1	1			1			1
1	39	1	4	4	1	2	3	1	2	2	2			2		2										2	4	1	1		1	1		1	1		1			1
2	33	1	3	4	1	2	3	1	2	2	2			2		2										2	4	2					1	1	1	1	1
1	34	1	4	4	1	2	2	2	2	2	2			2		2										1	4	2			1	1	1	1	1	1	1
2	32	1	3	4	1	2	4	2	2	1	1	1	1	1	1	2		2					2			2	4	1	1					1
2	33	1	4	1	1	2	4	2	2	2	2			2		2										2	4	2				1	1		1
1	33	1	4	1	1	2	3	1	2	1	2			2		2								2		1	4	2					1
2	34	1	1	2	1	2	3	1	2	2	2			2		2										2	4	2				1	1	1	1	1
1	33	2	4	1	1	2	3	2	1	1	2			2		2						2	2			2	4	2			1	1	1	1	1	1
2	34	1	4	1	1	2	4	2	2	2	2			2		2								2		2	4	2			1	1			1
1	39	1	4	4	1	2	3	1	2	1	2															2	4	2				1	1	1	1		1
2	36	1	4	4	1	2	2	1	2	2	2			2		2										2	4	2			1	1	1	1	1	1	1
1	31	1	4	4	1	2	2	1	2	2	2			2		2						2				2	4	2			1	1					1
1	32	1	4	3	1	2	2	2	1	1	2			2		2						2				2	4	2					1
1	34	1	2	4	1	2	2	2	2	2	2			2		2										2	4	2					1	1	1
2	37	1	4	3	1	2	2	1	1	2	2			2		2										2	4	2			1	1	1
2	37	1	1	2	1	2	2	2	2	1	2															2	4	2			1	1	1	1	1		1
1	34	1	2	3	1	2	2	1	1	2	1	1	1	1	1	2					2			2		2	4	2				1	1		1		1
1	32	1	4	4	1	2	4	1	2	2	2			2		2										2	4	2			1	1	1	1	1
2	34	1	4	4	1	2	2	1	1	2	2			2		2										2	4	2			1	1	1
2	34	1	4	4	1	2	3	2	2	2	2															2	4	2			1	1		1			1
2	38	1	4	1	1	2	4	2	2	2	2			2		2										2	4	2			1			1	1		1
1	36	1	4	1	1	2	4	2	1	1	2			2		2		2	2	2	2		2			1	1	2			1	1	1	1	1	1	1		1
1	35	1	1	4	1	2	3	2	2	2	2			2		2										1	4	2			1	1		1	1
2	30	1	3	4	2			2	2	2	2															2	4	2			1	1	1	1	1	1	1
1	32	1	1	4	1	2	3	2	2	2	2			2		2						2				1	4	1	1		1	1	1	1	1	1	1
2	30	1	1	4	1	2	3	2	2	2	2			2		2										2	4	2				1	1		1		1
2	40	2	4	3	1	2	3	1	1	1	2															1	4	2				1					1
2	40	2	4	1	1	2	4	2	2	1	2			2		2										1	1	2			1	1	1	1	1		1
2	30	3	4	1	1	2	3	2	2	2	2			2		2		2					2			2	4	2				1				1
1	31	1	4	4	1	2	2	1	2	2	2			2		2										2	4	2				1	1	1	1	1	1
2	38	2	4	1	1	2	4	2	2	2	2			2		2										2	4	2				1	1	1			1
1	33	1	3	2	1	2	3	2	2	2	2			2												2	4	2				1		1			1
1	29	1	4	3	1	2	3	1	2	2	2	1	0	2		2										1	1	2				1		1
1	36	1	4	1	1	2	3	2	2	2	2			2												2	4	2				1	1			1	1
2	33	1	4	4	1	2	3	2	2	2	2			2		2										2	4	2			1	1	1	1	1	1
1	33	1	4	1	1	2	3	1	1	1	2			2		2										2	4	2					1	1	1
1	35	1	2	1	1	2	4	1	2	1	2			2		2										2	4	2			1
2	35	1	4	4	1	2	3	2	2	2	2			2		2										2	4	2				1	1	1	1	1	1
1	42	1	4	3	1	2	3	2	2	2	2			2		2								2		2	4	2				1		1	1		1
2	38	1	4	1	1	2	3	2	1	2	2			2		2										2	4	2			1	1	1	1	1	1	1
2	35	1	4	3	1	2	4	2	1	2	2					2										2	4	2			1	1		1		1
1	38	2	2	2	1	2	4	2	2	2	2															2	4	2			1	1	1		1	1
2	31	1	4	3	1	2	2	2	2	2	2															2	4	2				1	1	1	1
2	35	1	4	1	1	2	4	1	1	2	2															2	4	2				1		1	1
1	33	2	2	1	1	2	4	1	1	1	1	2	1	2		1	1				2		2			2	4	2			1	1	1	1	1	1			1	1
1	34	1	2	1	1	2	3	2	2	2	2															2	4	2					1	1	1	1
1	33	2	2	1	1	2	2	1	2	2	2	1?		2		2		2					2			2	4	2			1	1	1	1	1	1	1		1	1
1	33	1	4	1	1	2	2	2	2	2	2			2		2										2	4	2									1
2	30	1	4	4	1	2	3	2	2	2	2															2	4	2							1
1	29	1	4	4	1	2	2	1	1	2	2			2		2										2	4	2			1	1	1	1	1	1	1		1	1
1	31	1	3	2	2			1	1	2	2															2	4	2				1	1	1	1
1	30	1	4	3	1	2	1	2	2	2	2			2		2										2	4	2			1	1	1				1
1	34	1	3	3	1	2	3	1	2	2	2															2	4	2				1		1	1	1
1	32	1	3	3	2			2	2	2	2															1	3	2				1		1					1
2	38	1	4	2	1	2	3	2	2	2	2															2	4	2			1	1	1	1	1
1	34	1	2	4	1	2	2	2	1	2	1	1	1		1	1	1			2		2				2	4	2				1	1	1	1
1	32	1	1	3	1	2	3	2	1	1	2			2		2										2	4	2			1		1		1	1
1	34	1	4	4	1	2	3	1	2	1	2		1	1	1	2										1	2	2			1	1		1	1
2	40	2	4	1	1	2	4	1	2	2	2			2		2										2	4	1				1	1
1	32	1	4	3	1	1	4	1	1	1	2			2		1	1					2				2	4	2			1	1	1		1	1
1	34	1	2	2	1	2	4	2	2	1	2			2												2	4	2						1	1
2	35	1	2	2	1	2	4	1	2	2	2			2		2										2	4	2			1	1	1	1	1	1	1		1	1
2	31	1	2	1	1	2	2	1	2	2	2															2	4	2				1	1			1
2	36	1	1	4	1	2	3	2	1	2	1	1	1	1	1								2			2	4	2					1		1	1
1	34	1	2	1	1	2	2	1	1	1	1	1	5	1	4	1	3	2	2			2	2	2		2	4	2			1	1	1		1	1	1		1
2	35	1	2	4	1	2	4	2	1	2	1	1	1	2		1	1					2	2	2		2	4	2				1	1	1	1	1
2	33	1	4	4	1	2	1	2	2	2	2												2			1	4	2					1
2	33	1	4	4	1	2	1	2	2	2	2												2			1	4	2					1
1	31	1	4	3	1	2	2	2	1	1	2			2		2										2	4	1		1	1			1
2	38	1	3	1	1	2	4	2	2	2	2															1	4	2				1		1	1
1	42	1	4	3	1	2	3	2	2	2	2			2		2								2		2	4	2				1	1	1	1		1
1	30	1	4	1	1	2	4	1	2	2	1	3	1	1	1	2			2			2				2	4	2							1
2	30	1	1	4	2			1	1	2	1	?	1	2		1	1						2			2	4	2				1	1	1	1	1	1		1
2	36	1	1	4	1	2	4	2	2	2	2															2	4	2			1	1	1	1	1	1	1
1	30	1	4	4	1	2	2	2	2	2	2			2		2										2	4	2					1
1	34	1	2	4	1	2	2	2	2	2	2															2	4	2					1
2	34	1	3	1	1	2	3	2	1	1	2			2		2										2	4	2			1	1		1	1
2	34	1	3	1	1	2	3	2	1	1	2			2		2										2	4	2			1	1		1	1
1	35	1	1	3	1	2	4	1	2	2	2		0	2		2										2	4	2				1		1	1
1	37	2	1	1	1	2	3	1	2	2	2															2	4	2			1	1	1		1	1	1
2	38	2	1	1	1	2	3	1	2	2	2		0	2		2										2	4	2				1	1	1	1	1
1	34	1	2	3	1	2	2	2	2	2	2															2	4	2				1	1
1	35	2	2	1	1	2	2	2	2	2	1	1	1	1	1	2			2			2				1	2	1	1				1	1	1	1	1
2	30	1	1	1	1	2	3	1	1	1	2			2		2										2	4	2			1	1	1	1	1	1	1
1	37	1	2	3	1	2	2	2	2	2	2			2		2										2	4	2				1	1	1	1	1
1	31	1	4	4	1	2	3	1	1	2	1	4	1	2		2				2		2				2	4	2			1	1	1	1	1
1	36	2	2	1	1	2	2	2	1	2	1	2	1	2		1	1			2			2			2	4	2			1	1	1	1	1
1	39	1	4	4	1	2	4	1	1	2	2			2		2										2	4	1	1		1	1	1				1
1	34	2	4	2	1	2	4	2	2	2	2			2		2		2	2	2		2				1	1	2			1	1	1	1	1	1	1		1	1
1	34	2	2	2	1	2	3	2	1	2	2			2		2										2	4	1	1		1	1	1		1	1				1
1	34	2	3	2	2			2	2	2	2					2										2	4	2									1
1	35	1	4	2	1	2	4	2	2	2	2															2	4	2						1	1
1	32	1	4	4	1	2	4	1	2	2	2			2		2										2	4	2				1	1
1	34	1	1	4	1	2	4	2	2	2	2			2		2										2	4	2			1	1	1	1	1	1	1
2	33	1	4	1	1	2	3	1	2	2	2															2	4	2				1
1	38	2	4	1	1	2	4	2	1	2	2			2		1	2					2				2	4	2						1
1	35	1	2	3	1	2	3	2	2	2	2		0	2		2										2	4	2							1	1
2	31	1	4	3	1	1	2	2	2	2	2															2	4	2				1	1	1	1
1	32	2	2	2	1	2	3	2	1	2	2															2	4	2			1	1	1	1	1	1
1	37	2	1	2	1	2	3	1	2	2	2					2										2	4	1	1				1	1	1	1	1
1	34	1	2	4	1	2	4	2	1	1	1	4	1	2		1	1		2				2			1	2	2			1	1	1		1	1
2	30	3	4	4	1	2	2	2	1	2	2			2		2										2	4	2				1		1
1	37	1	4	1	1	2	2	2	2	2	2			2		2										2	4	1	1					1
1	32	1	1	3	1	2	1	2	2	2	2			2		2										2	4	2			1	1	1	1			1
1	35	1	3	4	1	2	4	1	2	1	2			2		2			2					2		2	4	2				1		1			1
1	34	1	1	3	1	2	3	2	2	2	2			2		2										2	4	2			1		1	1	1	1	1			1
1	34	1	2	4	1	2	2	1	1	1	2			2												2	4	1		1		1	1	1			1
2	33	2	4	1	1	2	4	2	2	2	2					1						2				2	4	1	1		1		1		1
1	32	1	2	3	1	2	3	1	2	2	1	1	1	1	1	2			2			2				2	4	2				1	1			1
1	34	1	4	3	1	2	3	1	2	2	2															2	4	2			1	1		1
2	36	1	4	2	1	2	3	2	1	2	2					2										2	4	2			1		1	1	1	1	1			1
2	34	1	4	1	1	2	2	2	2	2	2			2		2										2	4	2			1	1	1		1	1
2	37	1	2	4	1	1		2	2	2	2			2		2						2				2	4	2				1	1		1	1
1	35	3	2	4	1	2	1	1	1	2	2															2	4	2				1
2	31	1	1	2	1	2	3	2	2	2	2			2		2										2	4	2			1	1	1	1	1	1	1		1	1
2	34	1	3	4	2			2	2	2	2			2		2										2	4	2			1	1	1	1	1		1
1	32	1	1	3	1	2	3	2	1	1	2			2		2										2	4	2			1		1		1	1
1	37	1	2	3	1	2	2	2	2	2	2			2		2										2	4	2			1	1	1		1	1
1	34	1	2	3	1	2	2	1	2	2	2															2	4	2			1					1	1
1	31	1	2	3	1	2	3	1	2	2	2			2		2										2	4	1	1		1	1	1				1
1	31	1	4	3	1	2	3	2	2	2	2			2												2	4	2			1	1	1	1
1	34	1	2	4	1	2	2	2	1	2	1	2		2		2				2		2	2	2		2	4	2					1		1	1	1
1	30	1	3	4	1	2	2	2	2	2	2															2	4	2				1	1				1
1	30	1	1	4	1	2	3	2	2	2	2															2	4	1		1	1	1	1	1	1	1	1
2	37	1	4	3	1	2	4	1	2	2	2			1	1	2							2			2	4	2			1		1	1	1	1	1
2	30	1	1	3	1	2	4	2	2	2	2															1	4	2					1
2	33	1	1	1	1	2	3	2	2	2	2			2		2										2	4	2							1		1
2	38	3	4	1	1	2	3	1	1	2	2			2		2										2	4	2			1		1	1	1
2	32	1	4	2	1	2	2	2	1	2	1	4	1	2		1	1		2		2		2			1	4	2			1		1	1	1	1
2	32	1	4	1	1	2	2	2	1	1	1	2	1	2		2							2			2	4	2			1	1	1	1		1
1	42	2	4	1	2			2	2	2	2															1	1	2					1		1
1	40	1	3	4	1	2	4	1	2	2	2			2		2		2	2	2	2	2	2	2		1	4	1	1								1
1	33	1	2	4	1	2	2	1	1	2	2			2		2										2	4	2				1	1	1			1
1	32	1	1	4	1	2	3	1	2	2	2			2		2		2					2			1	4	2				1	1
